# Supplementary material for: Dopamine release plateau and outcome signals in dorsal striatum contrast with classic reinforcement learning formulations
Source: Springer Nature journal article supplement (doi:10.1038/s41467-024-53176-7), 2024-10-14
Supplement: 41467_2024_53176_MOESM3_ESM.pdf [file 41467_2024_53176_MOESM3_ESM.pdf]

## **Description of Additional Supplementary Files**

**File name: Supplementary Data 1**

Description: Photometry data for sample cue conditioning and random reward sessions.

**File name: Supplementary Data 2**

Description: Photometry data for sample cue discrimination and reversal discrimination sessions.

**File name: Supplementary Data 3**

Description: Photometry data for sample probabilistic reward sessions.

**File name: Supplementary Data 4**

Description: Photomicrographs of probe sites with sensor expression.
